# Supplementary material
Source: publisher figshare collection journal article supplement (https://plos.figshare.com/articles/dataset/_/11962998)

**S3 Figure. The yearly NDVI time series of nine NPP-related forest categories during 2004-2013.** The NDVI of C7-9 increased slightly in 2010. Comparing with the time series of yearly NPP (Fig 1) which shows that the NPP of C7-9 declines in 2010, we can infer that the role of climate factors in the variance of NDVI and NPP may not be entirely the same.

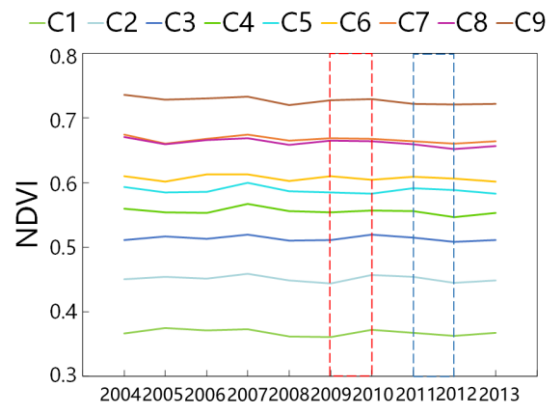

Supplement: Supplementary file [file 1]
