# Supplementary material
Source: publisher figshare collection journal article supplement (https://plos.figshare.com/articles/dataset/_/11962998)

**S2 Figure. The monthly FPAR and percentage of FPAR derived from back-up algorithm.** The FPARs of June to September are relative high (58%-63%), while their percentage of back-up algorithm retrievals are relative low (0-2%). On the contrary, the percentages of back-up algorithm retrievals of January to March and November to December are relative high (14%-28%) and their FPARs are relative low (49%-55%). The average percentage of back-up algorithm retrievals is about 11% for the nine categories.

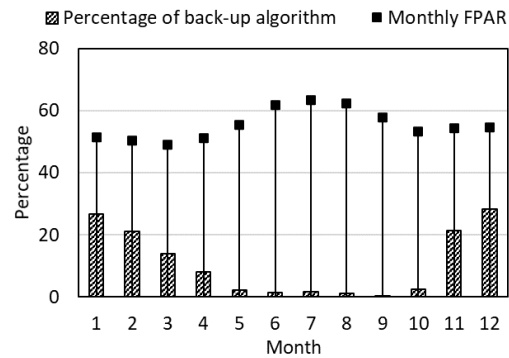

Supplement: Supplementary file [file 1]
